# Supplementary material
Source: PubMed Central journal article supplement (PMC5453669)

**A***HL-1*  
*Cardiomyocyte-*  
*Derived Cells*Adsh  
scrambled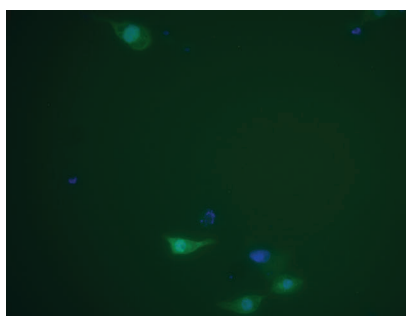

16.5nM T3

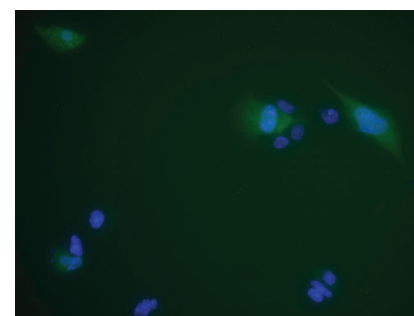Adsh  
MuRF1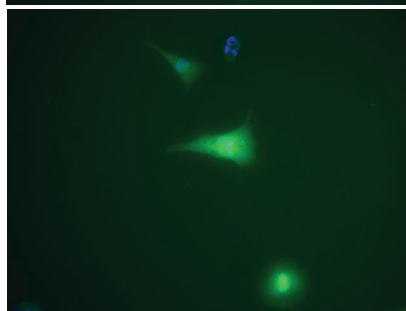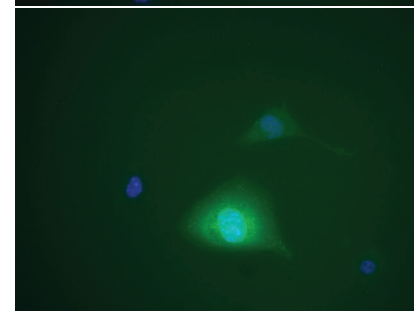**B***HL-1*  
*Cardiomyocyte-*  
*Derived Cells*

AdGFP

Vehicle

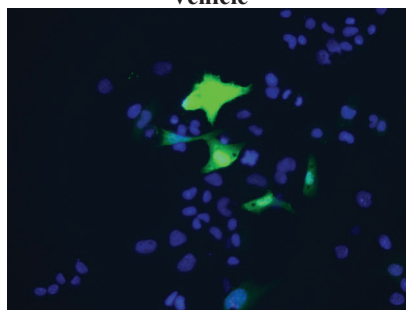

16.5nM T3

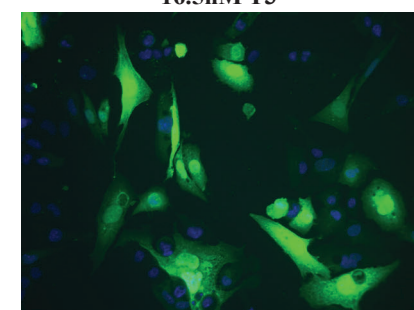

AdMuRF1

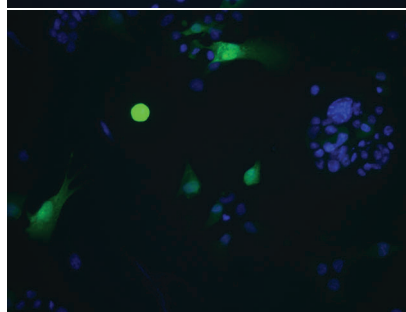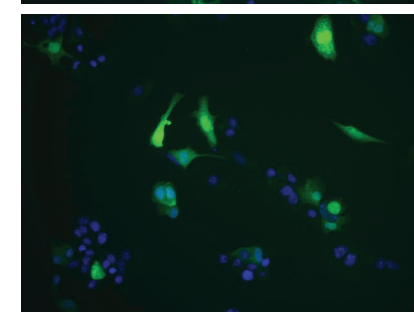**C***Neonatal Rat*  
*Cardiomyocytes*

AdGFP

Vehicle

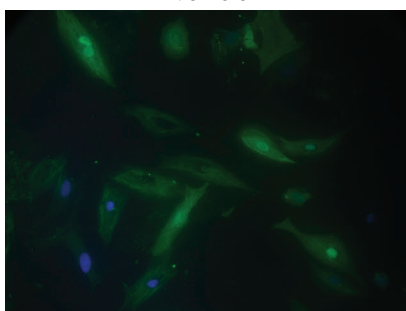

16.5nM T3

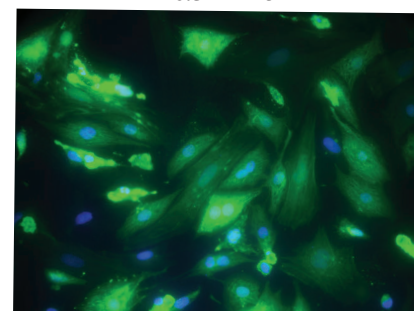

AdMuRF1

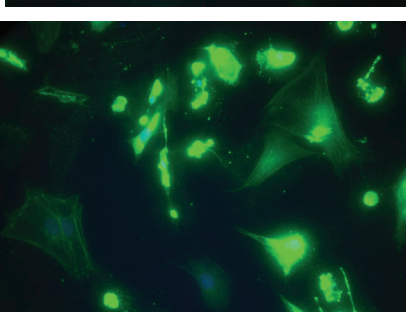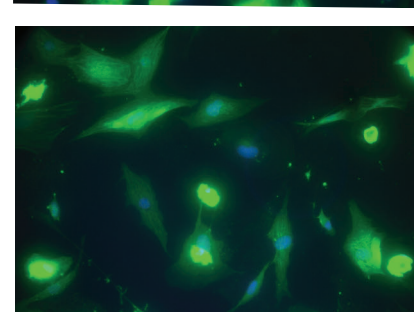

Supplement: NIHMS859211-supplement-Sup_Fig_1.pdf [file NIHMS859211-supplement-Sup_Fig_1.pdf]
