# Supplementary material
Source: PubMed Central journal article supplement (PMC5453669)

# Supplemental Figure 3.

**A.**

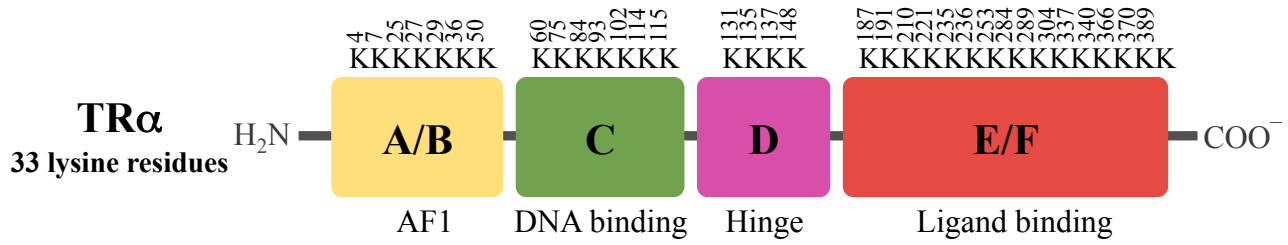

MEOKPSKVECGSDPEENSARSPDGRKRKRKNGOCPLKSSMSGYIPSYLDKDEOCVVCGDKATGYHYRCITCEGCKGFFRRTIOKNLHPTYSCKY  
DSCCVIDKITRNQCQLCRFKKCIAVGMAMDLVLDSDKRVAKRKLIEQNRERRRKEEMIRSLQQRPEPTPEEWDLIHVATEAHRSTNAQGSWKQ  
RRKFLPDDIGQSPIVMPDGDKVDLEAFSEFTKIITPAITRVVDFAKKLPMFSELPCEDQIILLKGCCMEIMSLRAAVRYDPESDTLTLGEMAVKRE  
QLKNGGLGVVSDAIFELGKLSAFNLDDETEVALLQAVLLMSTDRSGLLCVDKIEKSQEAYLLAFEHYVNRKHNIPHFWPKLLMKVTDLRMIG  
ACHASRFLHMKVECPTELPPLFLEVFEDQEV

From: GenBank: X07750.1, Mouse c-erbA alpha 1 mRNA for thyroid hormone receptor

*Nucleic Acids Res.* 1988 Jul 11;16(13):6248; Overlapping with Sap et al. in *Nature* 324:635-640, 1986, Y00987 and Thompson et al. in *Science* 237:1610-1614, 1987, M18028.

**B.**

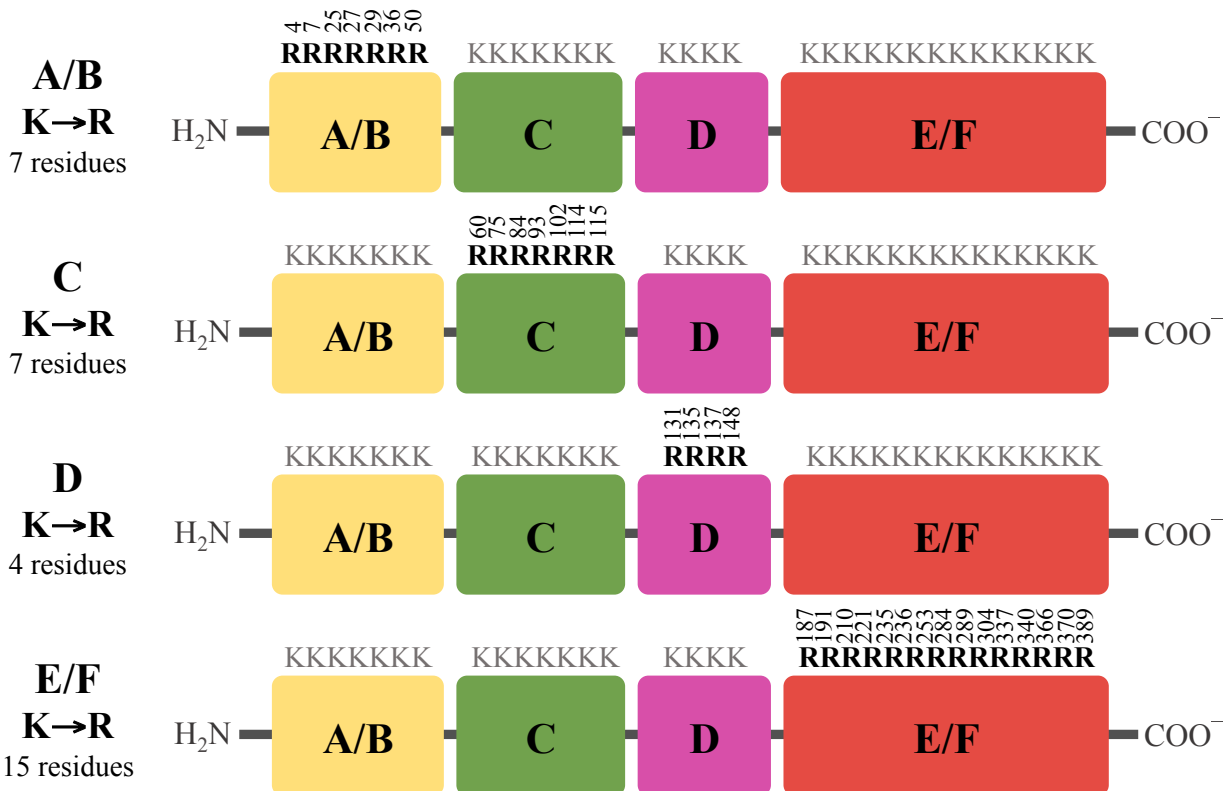

Supplement: NIHMS859211-supplement-Sup_Fig_3.pdf [file NIHMS859211-supplement-Sup_Fig_3.pdf]
