# Supplementary material
Source: PubMed Central journal article supplement (PMC5453669)

Supplemental Figure 2.

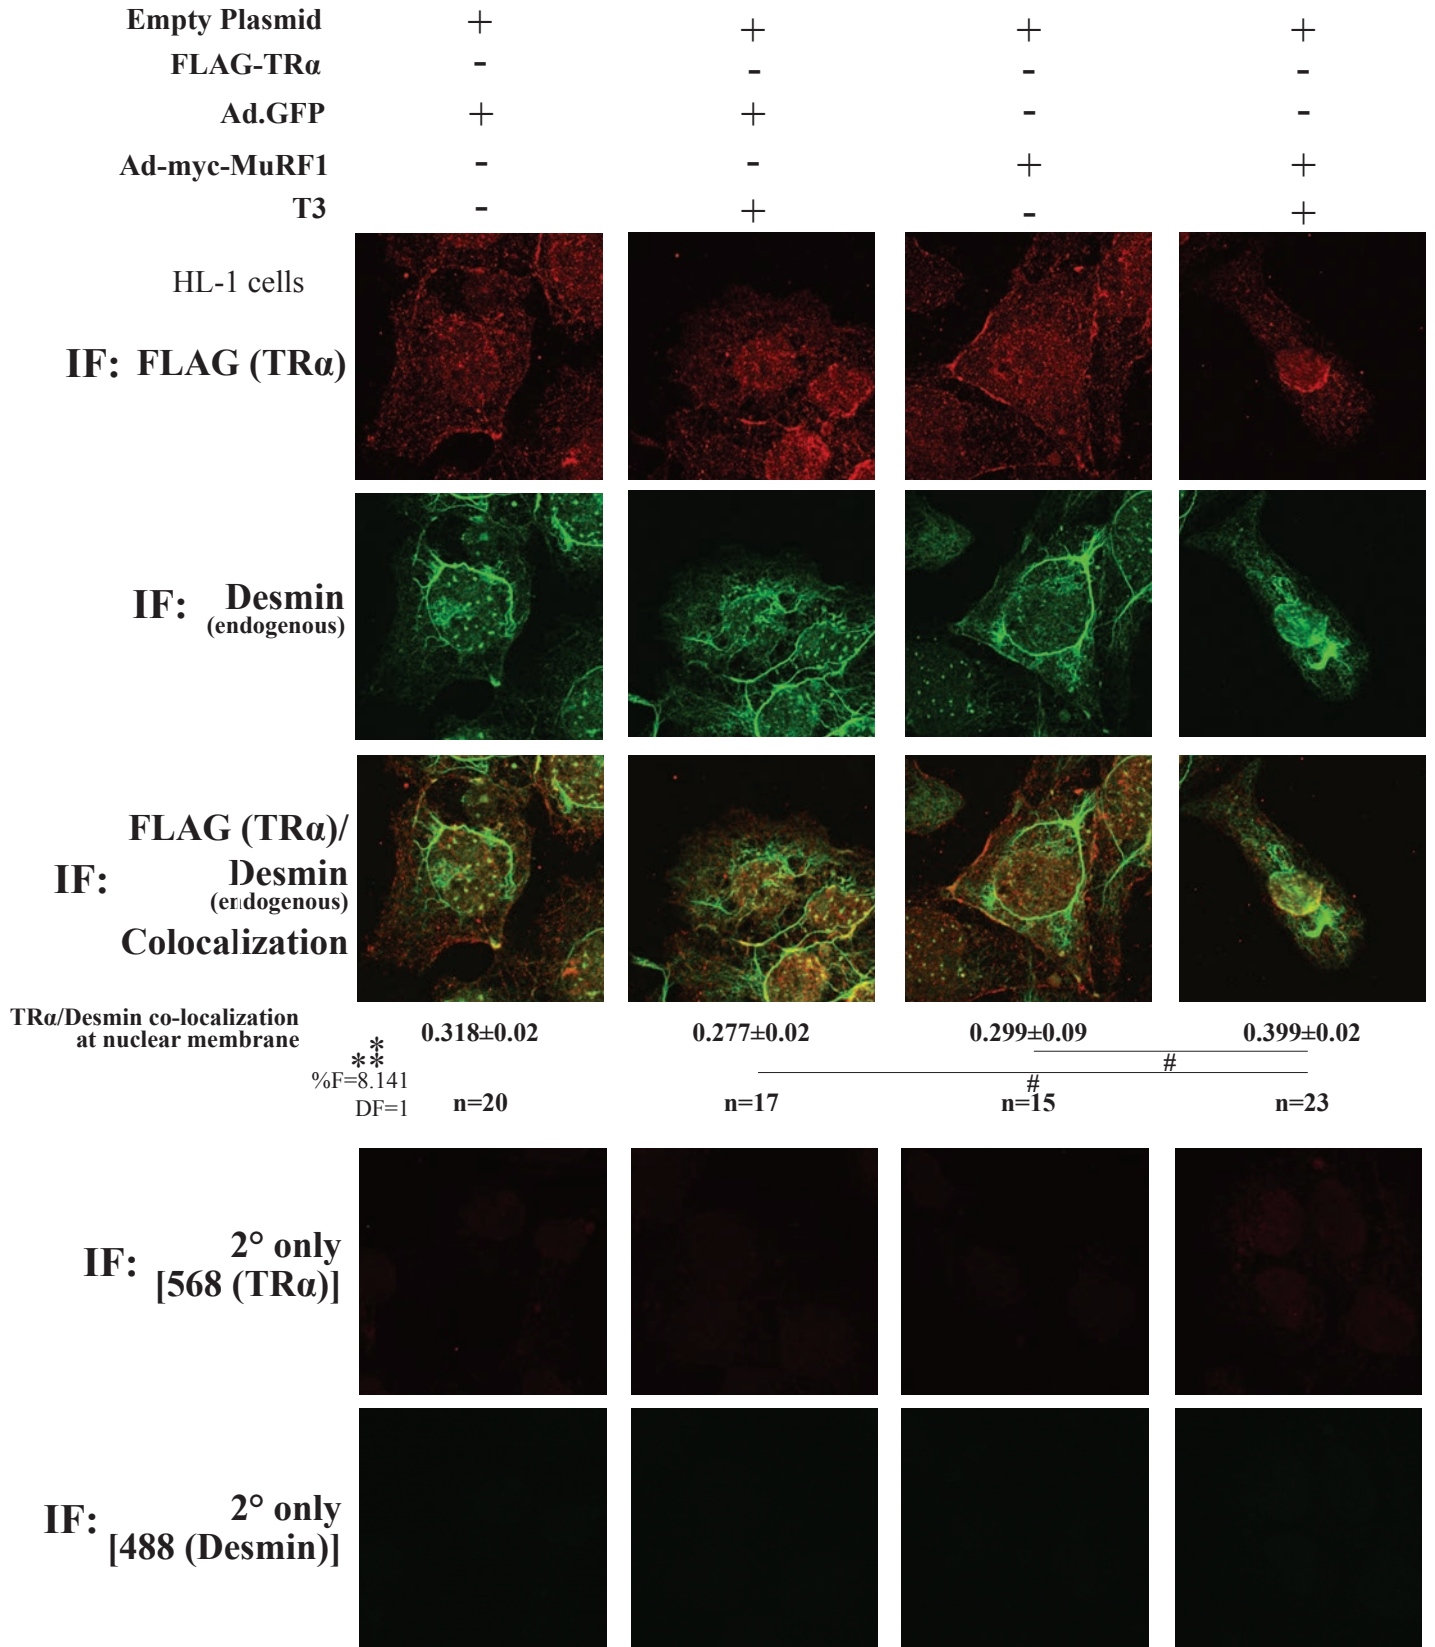

Supplement: NIHMS859211-supplement-Sup_Fig_2.pdf [file NIHMS859211-supplement-Sup_Fig_2.pdf]

**A**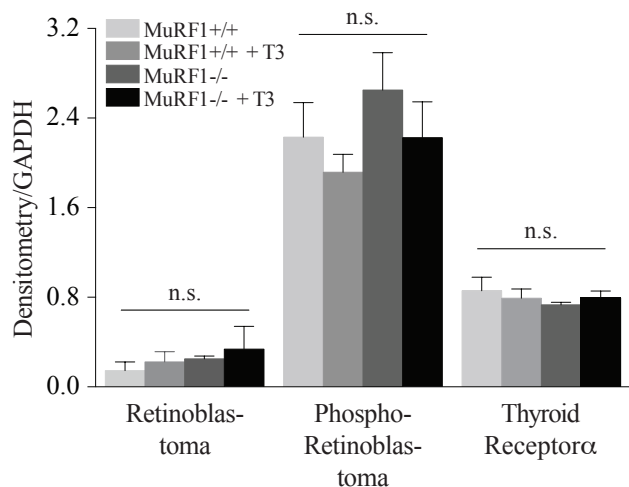**IB:**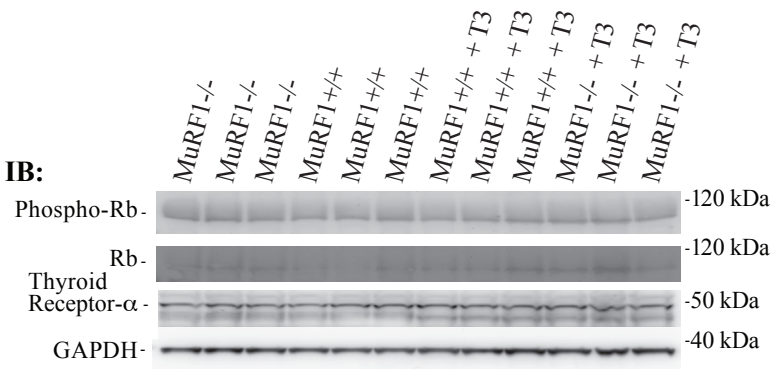**B**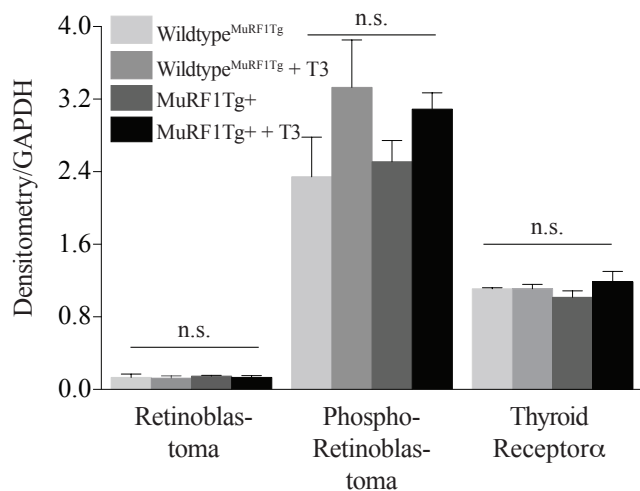**IB:**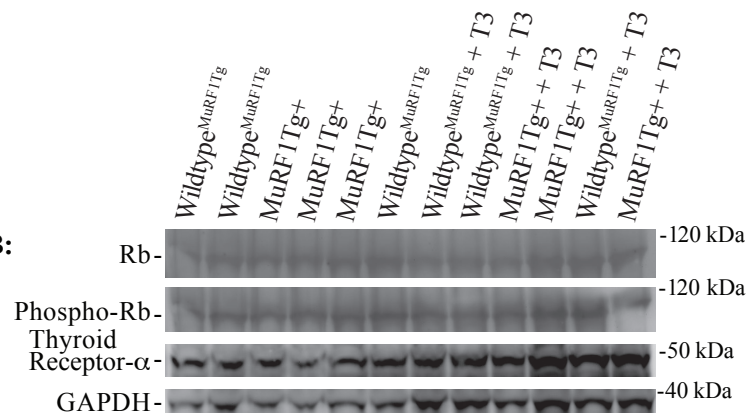

Supplement: NIHMS859211-supplement-Sup_Fig_4.pdf [file NIHMS859211-supplement-Sup_Fig_4.pdf]

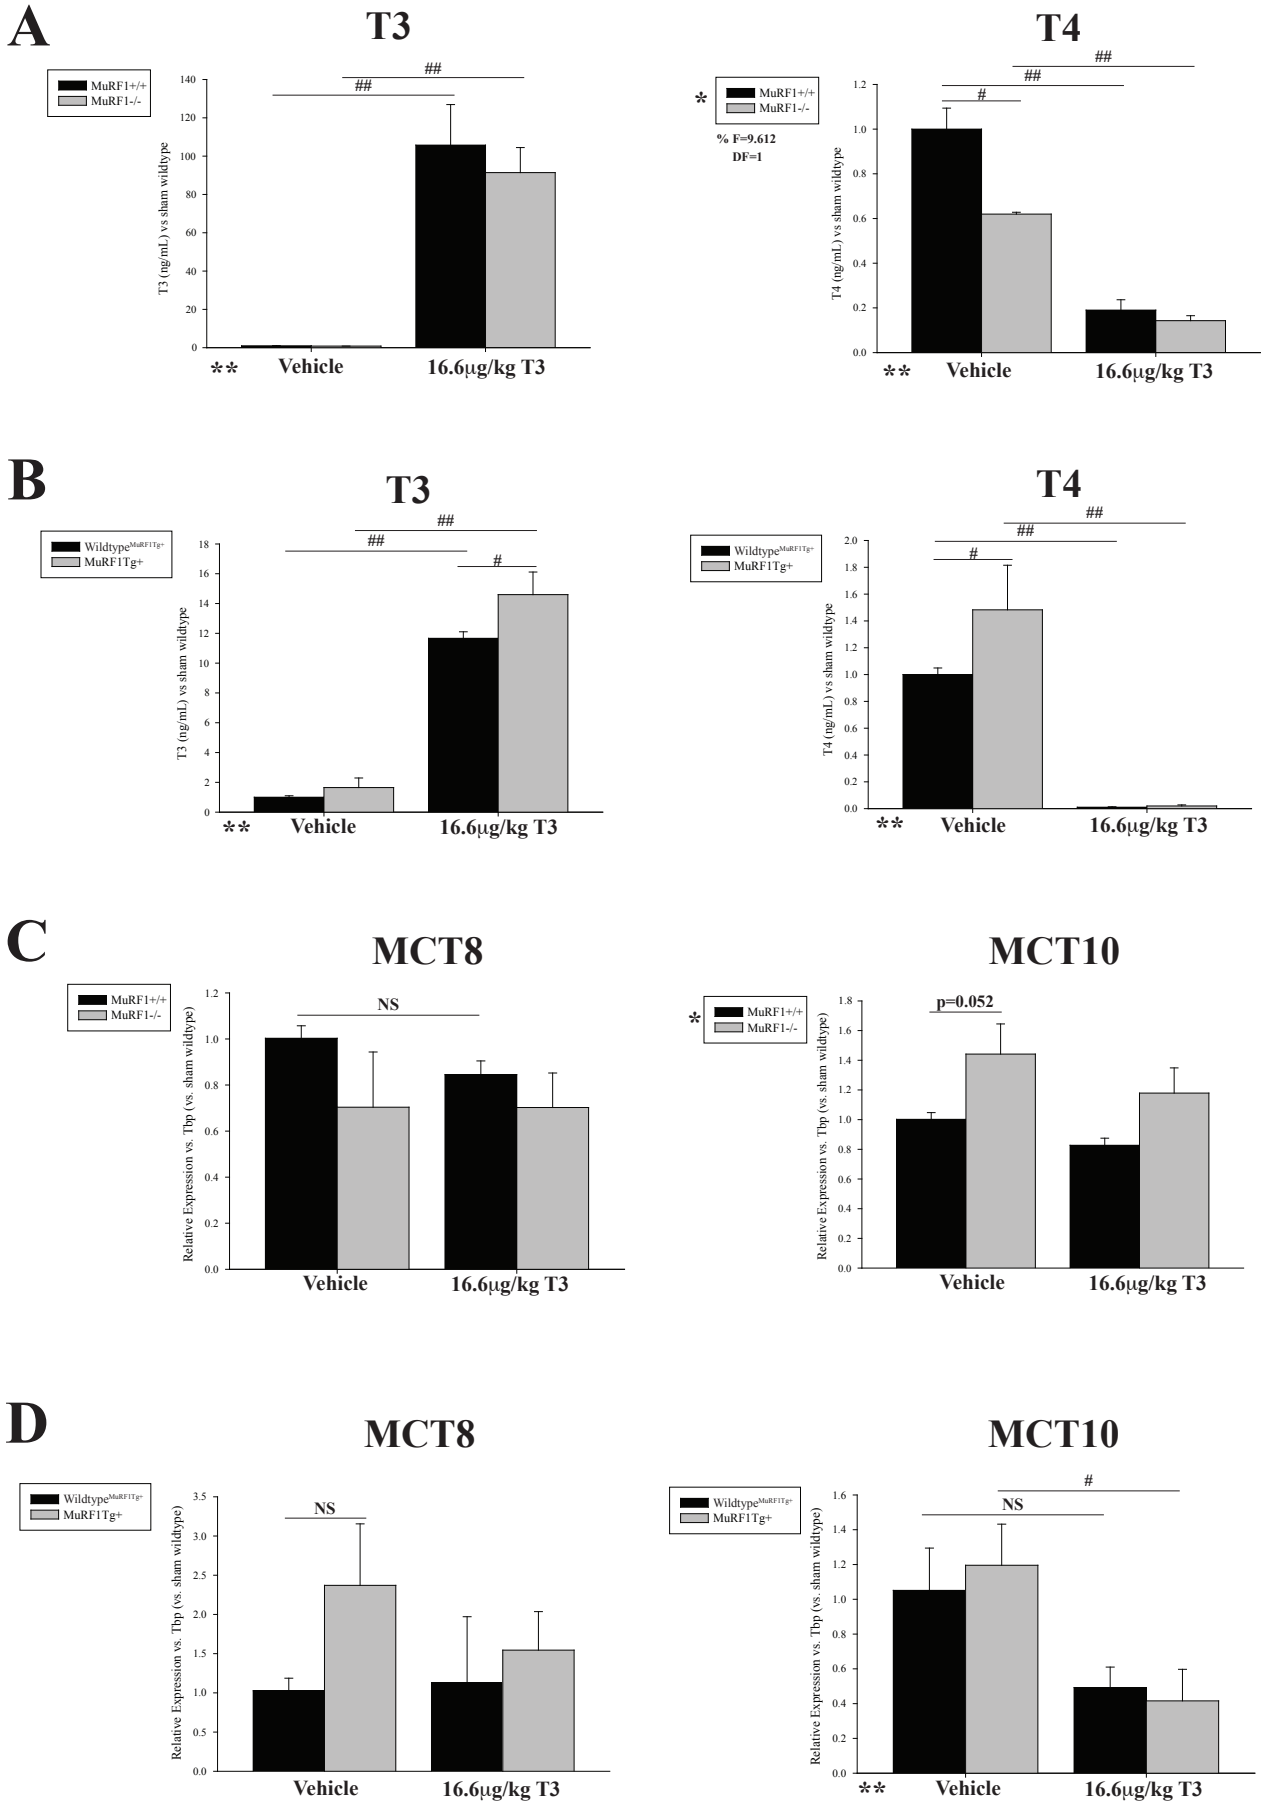

Supplement: NIHMS859211-supplement-Sup_Fig_5.pdf [file NIHMS859211-supplement-Sup_Fig_5.pdf]
